# Supplementary material for: Two novel temperate bacteriophages infecting Streptococcus pyogenes: Their genomes, morphology and stability
Source: PubMed Central journal article supplement (PMC6195288; doi:10.1371/journal.pone.0205995), 2018-10-19

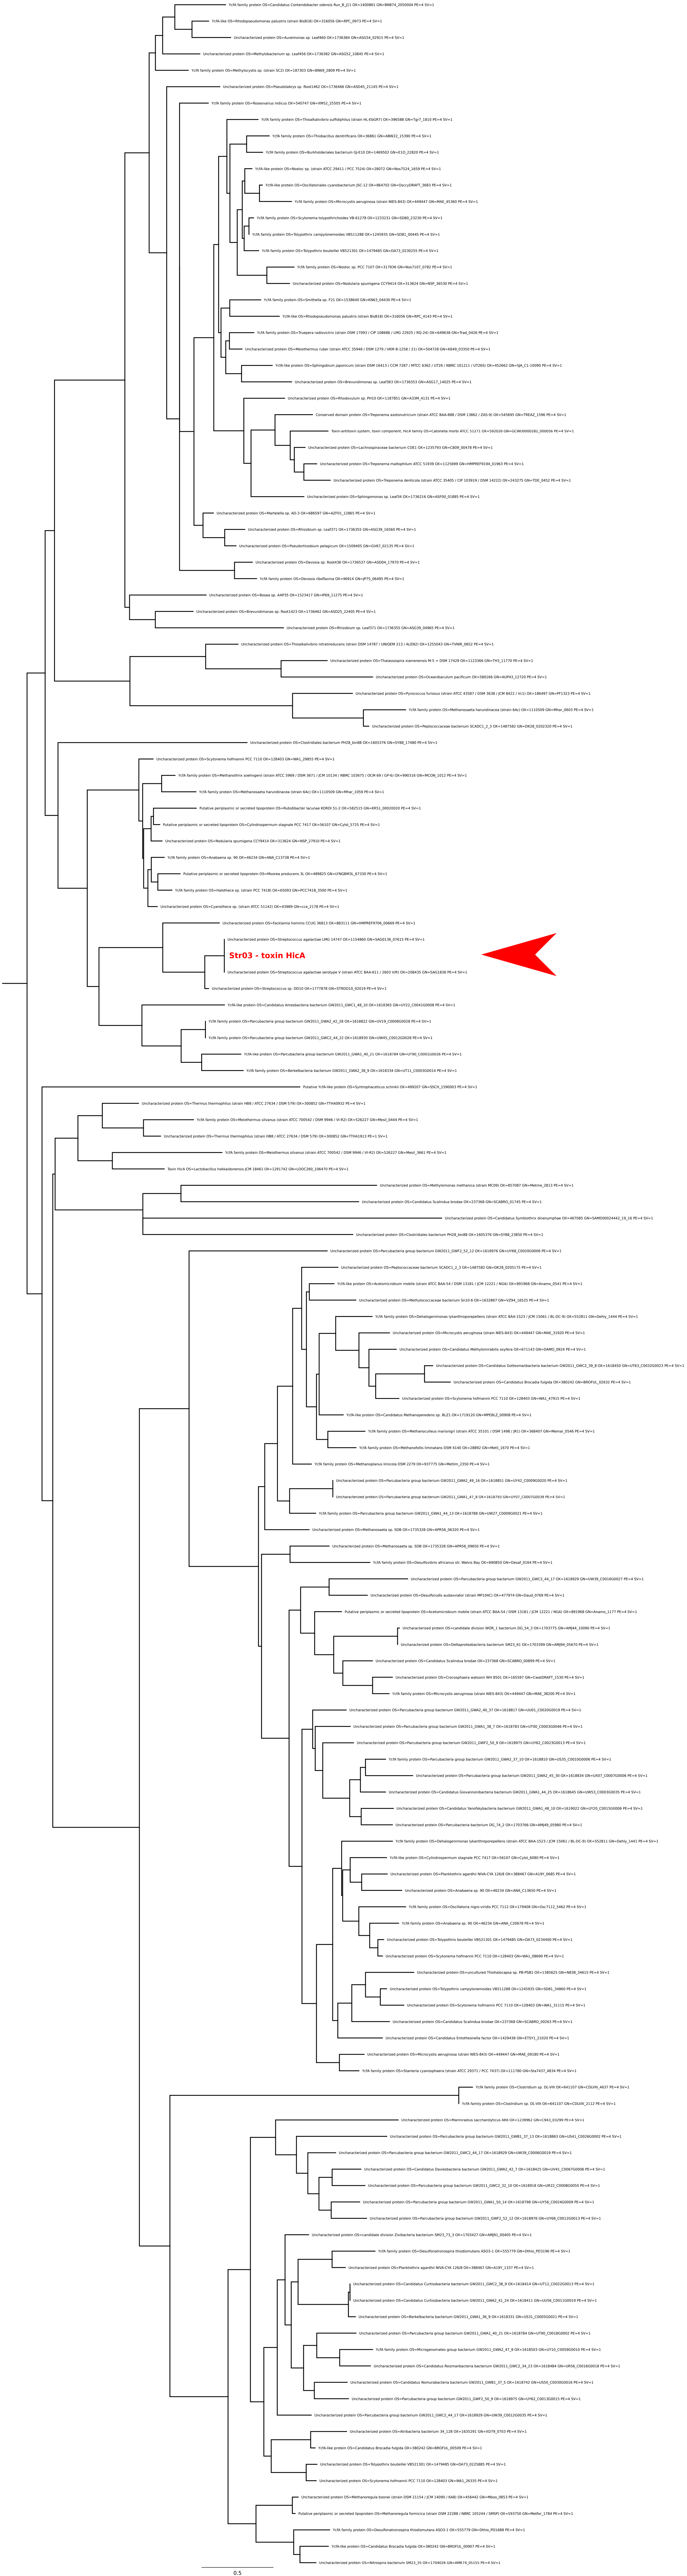

Supplement: pone.0205995.s005.pdf [file pone.0205995.s005.pdf]
